# Supplementary material for: Searching low-energy conformers of neutral and protonated di-, tri-, and tetra-glycine using first-principles accuracy assisted by the use of neural network potentials
Source: Royal Society of Chemistry journal article supplement (doi:10.1039/d3cp05659g), 2024-01-01
Supplement: d3cp05659g1.pdf [file d3cp05659g1.pdf]

**Electronic Supplementary Information  
For**

**Searching low-energy conformers of neutral and protonated di-, tri-,  
and tetra-glycine with first-principle accuracy assisted by the use of  
neural network potentials**

Dong Cao Hieu,<sup>a,b,c</sup> Po-Jen Hsu,<sup>a</sup> and Jer-Lai Kuo,<sup>a,b,c,d</sup>

- <sup>a</sup>. Institute of Atomic and Molecular Sciences, Academia Sinica, Taipei, 10617, Taiwan
- <sup>b</sup>. Molecular Science and Technology Program, Taiwan International Graduate Program, Academia Sinica, Taipei, 11529, Taiwan
- <sup>c</sup>. International Graduate Program of Molecular Science and Technology (NTU-MST), National Taiwan University, Taipei 10617, Taiwan
- <sup>d</sup>. Department of Chemistry, National Tsing Hua University, Hsinchu 30013, Taiwan.

**\*To whom correspondence should be addressed. E-mail:**

[jlkuo@gate.sinica.edu.tw](mailto:jlkuo@gate.sinica.edu.tw) (Jer-Lai Kuo)

## Contents

**Figure S1.** Analyze  $\Delta E1$ ,  $\Delta F1$ ,  $\Delta E2$ , and RMSD between min structures by NNP and M06-2X.

**Figure S2.** M06-2X minima of Gly<sub>n</sub>\_2-4 within 0-10 kJ/mol of ZPE-corrected energy.

**Figure S3.** M06-2X minima of H<sup>+</sup>Gly<sub>n</sub>\_2-4 within 0-10 kJ/mol of ZPE-corrected energy.

**Figure S4.** Root Mean Square Deviation (RMSD) between NNP-2 and M06-2X minima (Å).

**Figure S5.** The correlation between NNP-2 energy (y-axis) and M06-2X energy (x-axis) of all NNP-2 stable configurations within 0-50 kJ/mol. The zero of the relative energies is calculated with respect to the lowest M06-2X energy ( $\Delta E1$  in Table 2).

**Figure S6.** The energy histogram of Gly<sub>n</sub> (left) and H<sup>+</sup>Gly<sub>n</sub> (right) at M06-2X level.

**Figure S7.** The prediction of the NNP-2 neutral model (top-left) and NNP-2 protonated model (top-right) model on the test set of Gly<sub>4</sub> and H<sup>+</sup>Gly<sub>4</sub>. And The prediction of one neutral+protonated model (bottom) on the test set of Gly<sub>4</sub> and H<sup>+</sup>Gly<sub>4</sub>

**Table S1.** Number of distinct DFTB-3 minima with varying amplitudes from  $0.1\pi$  to  $0.5\pi$  for Gly<sub>3</sub>.

**Table S2.** Number of distinct minima at cam-B3LYP/def2TZVPP, M06-2X/6-311+G(d,p), and MP2/6-311+G(d,p) level (from 400 DFTB-3 minima)

**Table S3.** Number of training sets of the model's generations

**Figure S1.** Analyze  $\Delta E1$ ,  $\Delta F1$ ,  $\Delta E2$ , and RMSD between min structures by NNP and M06-2X.

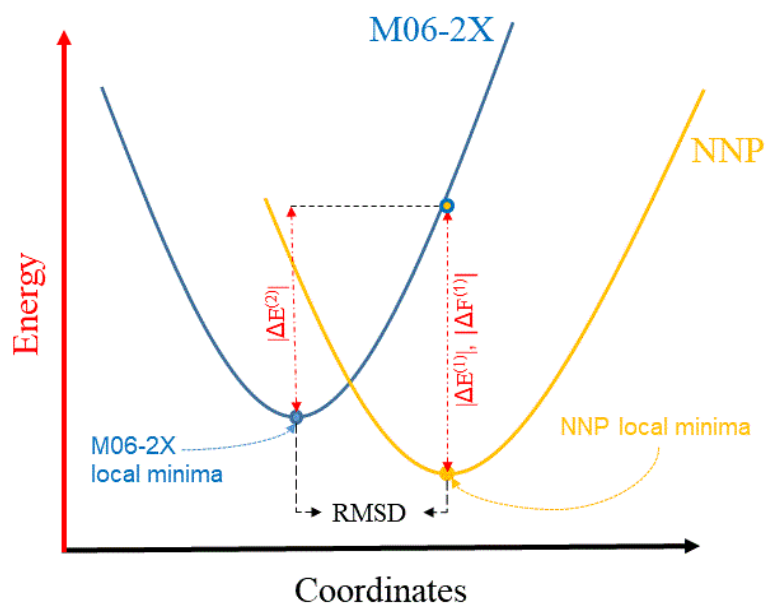

**Figure S2.** M06-2X minima of Gly<sub>n</sub>\_2-4 within 0-10 kJ/mol of ZPE-corrected energy.

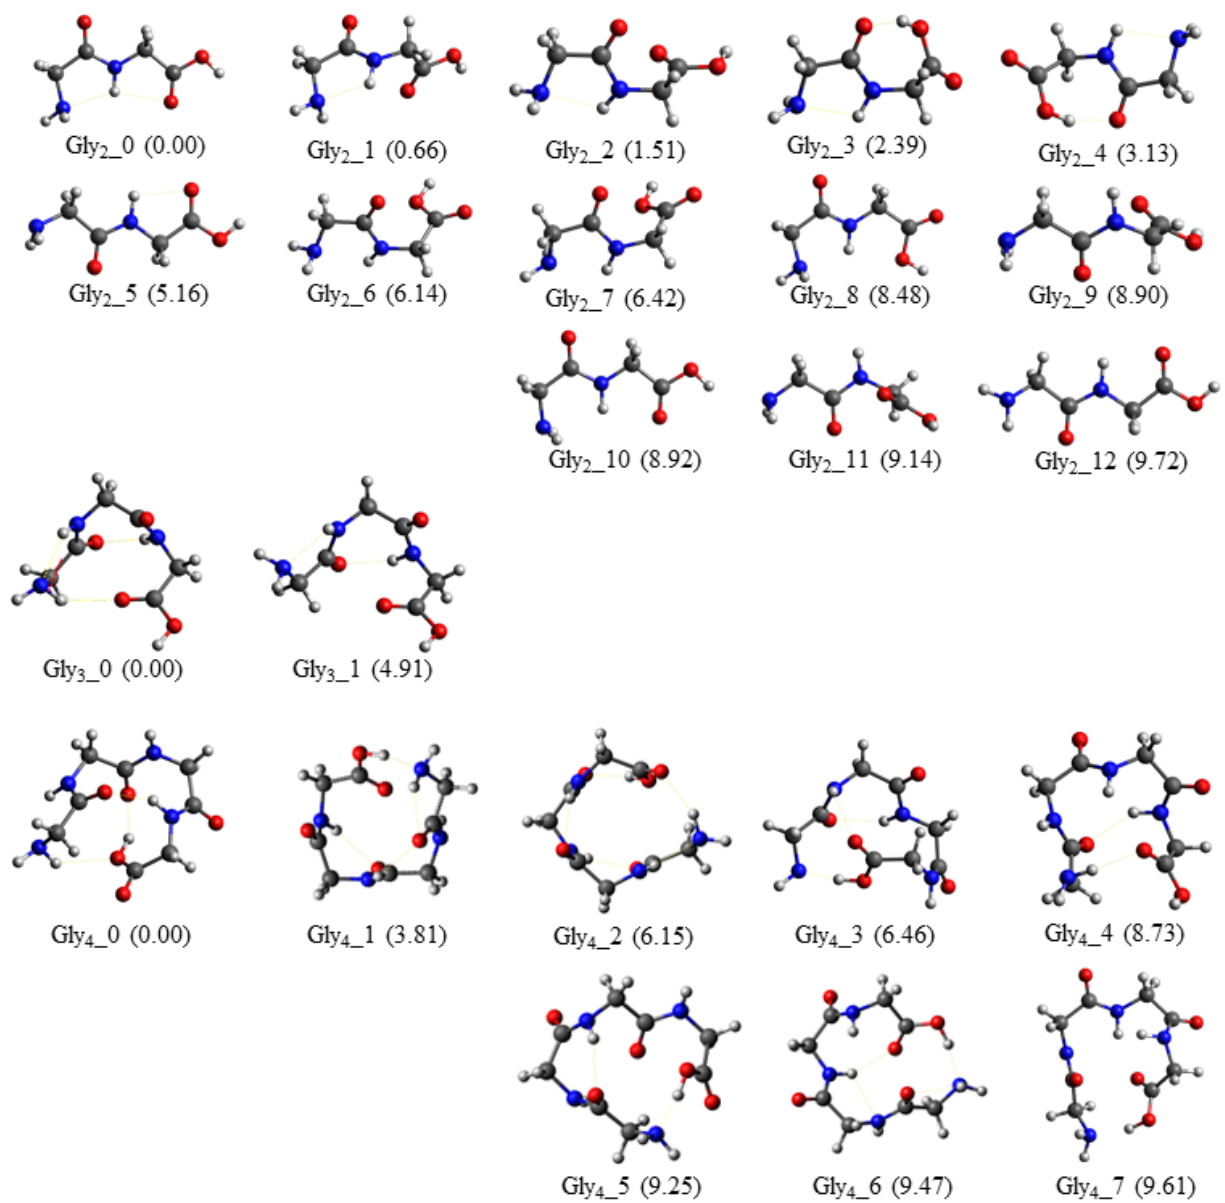

**Figure S3.** M06-2X minima of H<sup>+</sup>Gly<sub>n</sub>\_2-4 within 0-10 kJ/mol of ZPE-corrected energy.

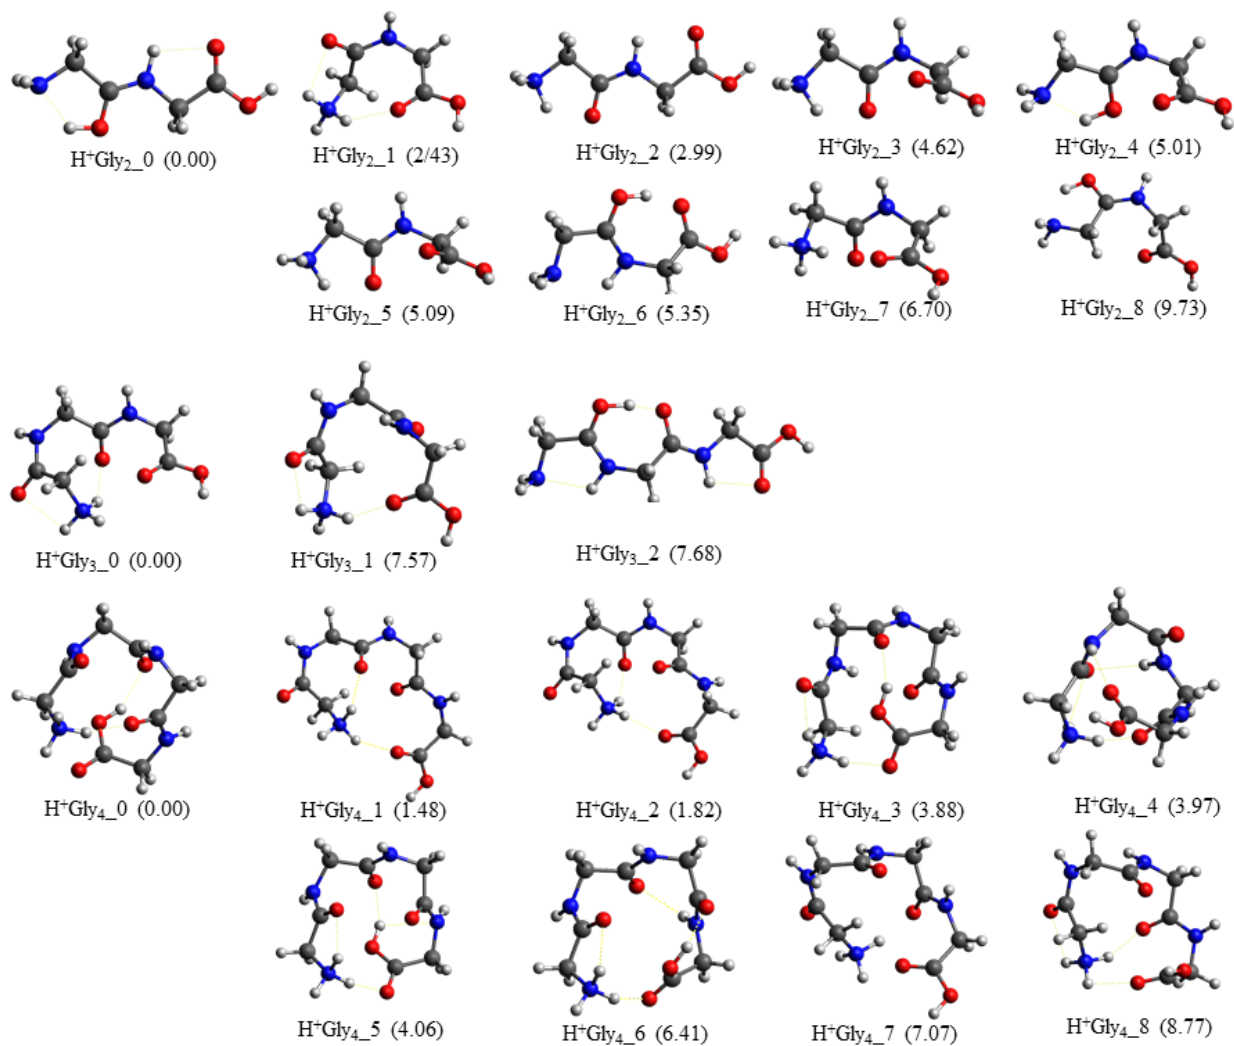

**Figure S4.** Root Mean Square Deviation (RMSD) between NNP-2 and M06-2X minima ( $\text{\AA}$ ).

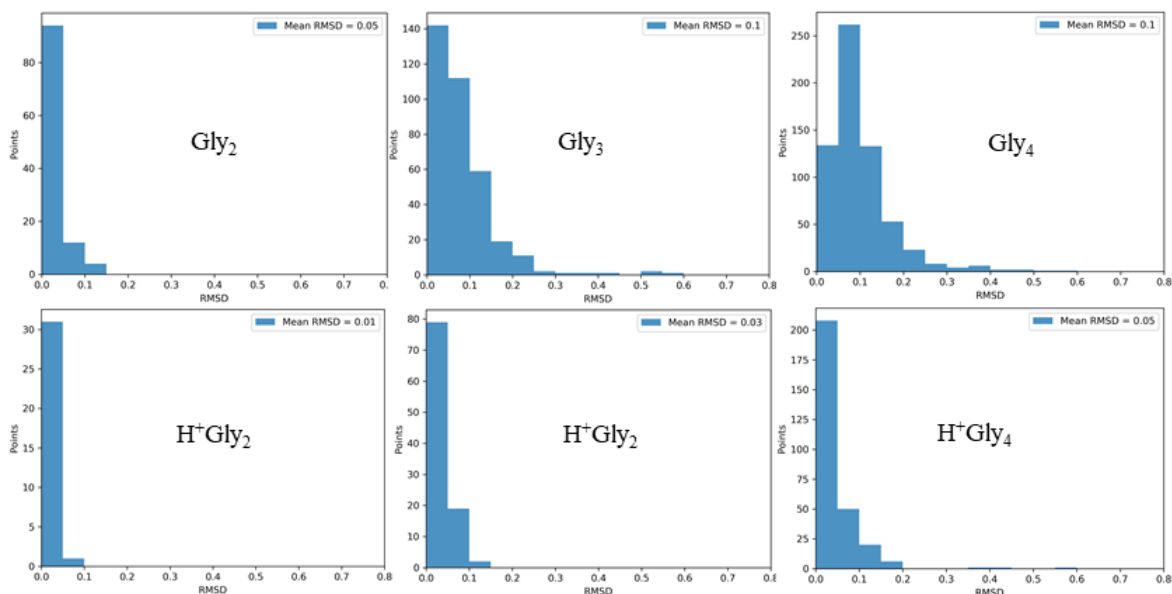

**Figure S5.** The correlation between NNP-2 energy (y-axis) and M06-2X energy (x-axis) of all NNP-2 stable configurations within 0-50 kJ/mol. The zero of the relative energies is calculated with respect to the lowest M06-2X energy ( $\Delta E_1$  in Table 2).

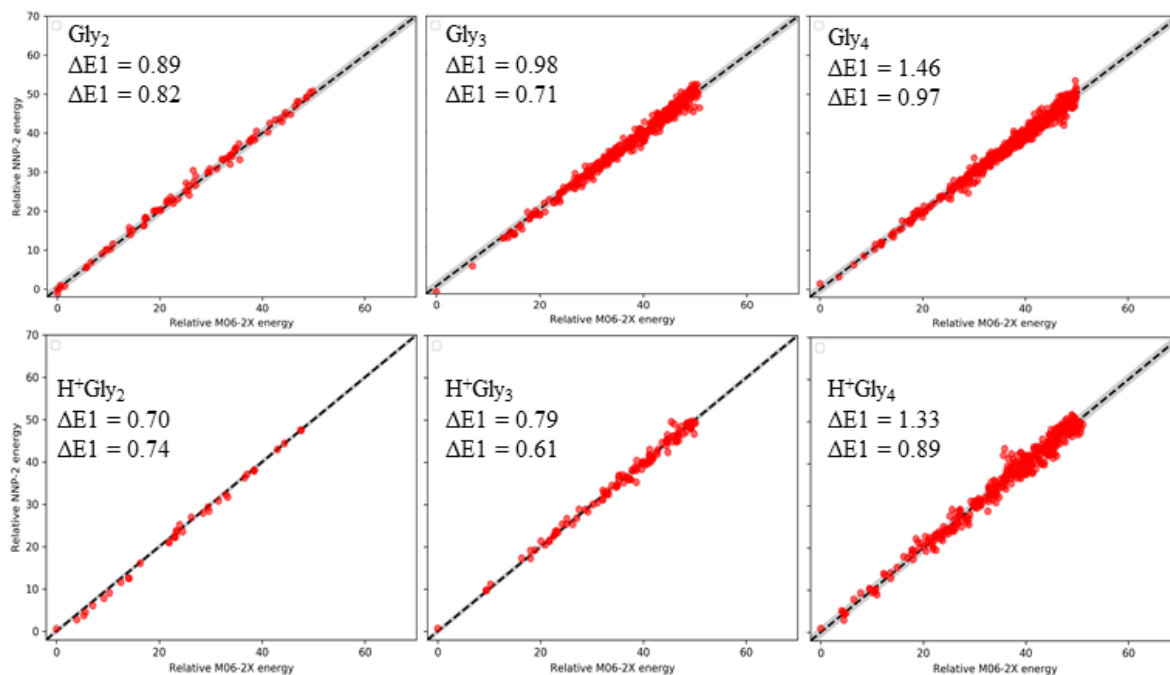

**Figure S6.** The energy histogram of Gly<sub>n</sub> (left) and H<sup>+</sup>Gly<sub>n</sub> (right) at M06-2X level.

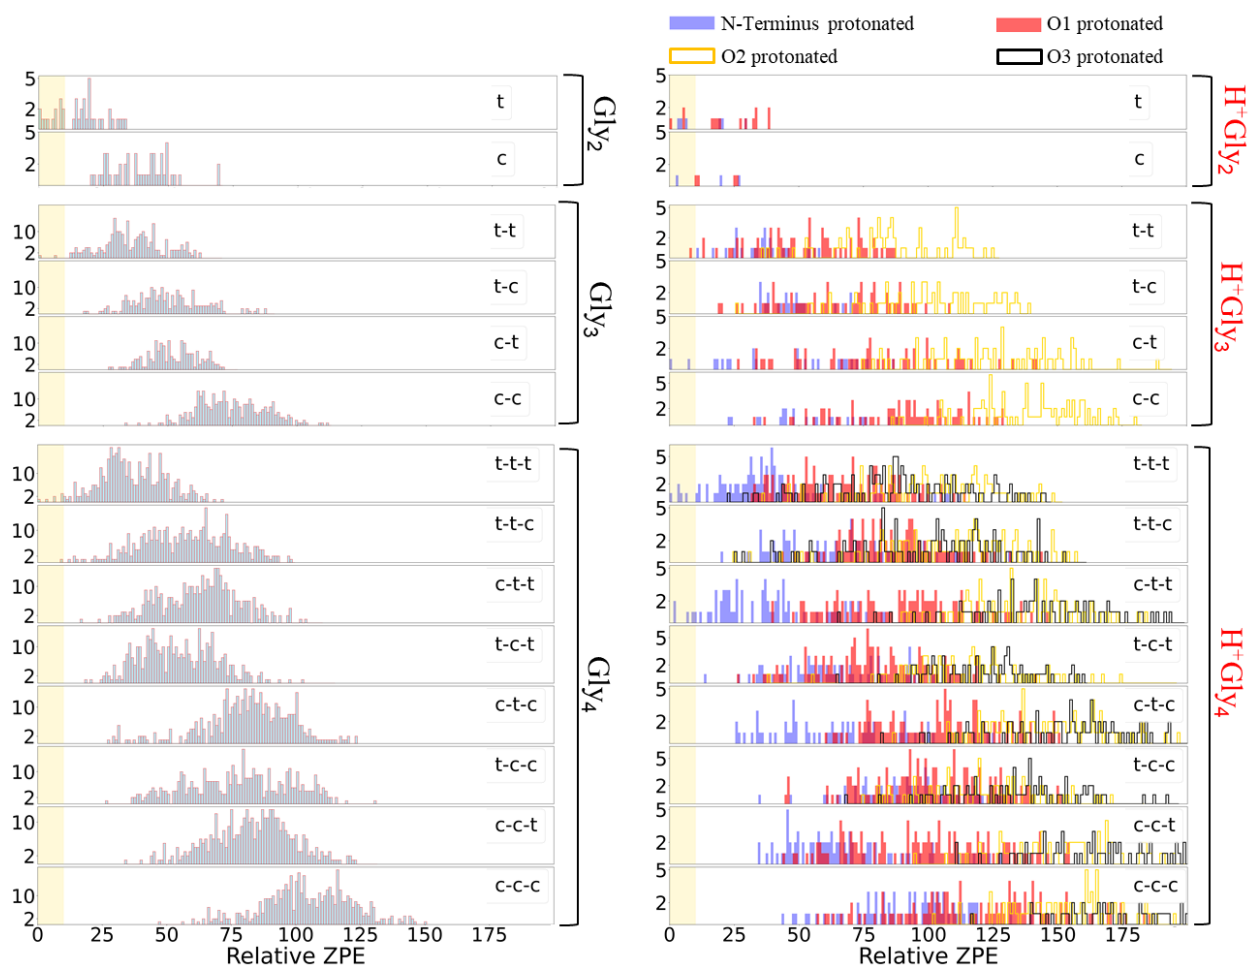

**Figure S7.** The prediction of the NNP-2 neutral model (top-left) and NNP-2 protonated model (top-right) model on the test set of Gly<sub>4</sub> and H<sup>+</sup>Gly<sub>4</sub>. The prediction of one neutral+protonated model (bottom) on the test set of Gly<sub>4</sub> and H<sup>+</sup>Gly<sub>4</sub>. The performance of the NNP-2 neutral or NNP-2 protonated model surpasses that of the neutral\_protonated model trained on neutral+protonated data. The training duration for the NNP-2 neutral model or NNP-2 protonated model, which is 50 hours, is shorter than that of the neutral\_protonated model, which takes 94 hours.

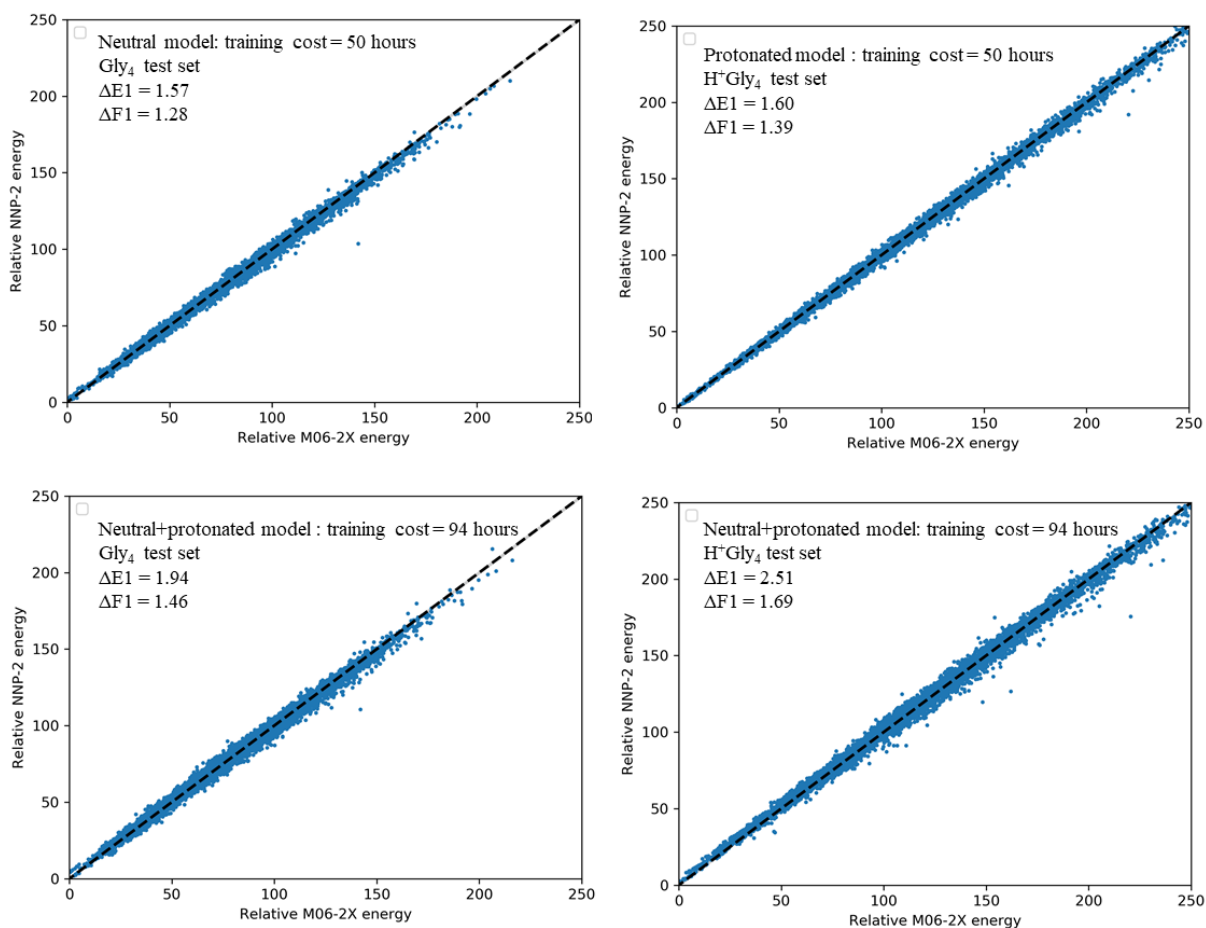



| Amplitudes       |                   | $0.1\pi$ | $0.2\pi$ | $0.3\pi$ | $0.4\pi$ | $0.5\pi$ |
|------------------|-------------------|----------|----------|----------|----------|----------|
| Gly <sub>3</sub> | Trial structures  | 20k      | 20k      | 20k      | 20k      | 20k      |
|                  | DFTB-3 min        | 3618     | 4117     | 4134     | 4082     | 3942     |
|                  | DFTB-3 min (0-50) | 3276     | 3682     | 3883     | 3484     | 3687     |

**Table S1.** Number of distinct DFTB-3 minima with varying amplitudes from  $0.1\pi$  to  $0.5\pi$  for Gly<sub>3</sub>

| Glycine            | Gly <sub>2</sub> | Gly <sub>3</sub> | H <sup>+</sup> Gly <sub>2</sub> | H <sup>+</sup> Gly <sub>3</sub> |
|--------------------|------------------|------------------|---------------------------------|---------------------------------|
| camB3LYP/def2TZVPP | 55               | 119              | 48                              | 107                             |
| M06-2X/6311+G(d,p) | 87               | 146              | 55                              | 110                             |
| MP2/6-311+G(d,p)   | 85               | 139              | 50                              | 95                              |

**Table S2.** Number of distinct minima at cam-B3LYP/def2TZVPP, M06-2X/6-311+G(d,p), and MP2/6-311+G(d,p) level (from 400 DFTB-3 minima)

|                                                      | Name of peptide      | NNP-0 | NNP-1 | NNP-2 | Test set |
|------------------------------------------------------|----------------------|-------|-------|-------|----------|
| The training set for Gly <sub>n</sub>                | Gly-2                | 1450  | 6543  | 6543  | 1613     |
|                                                      | Gly-3                | 5622  | 15768 | 25263 | 5724     |
|                                                      | Gly-4                | 8190  | 23433 | 27908 | 7607     |
| The training set for H <sup>+</sup> Gly <sub>n</sub> | H <sup>+</sup> Gly-2 | 1700  | 6752  | 6752  | 1629     |
|                                                      | H <sup>+</sup> Gly-3 | 4418  | 18593 | 25759 | 4262     |
|                                                      | H <sup>+</sup> Gly-4 | 6736  | 25863 | 27385 | 6915     |

**Table S3.** Number of training sets of the model's generations
